# Supplementary material for: Inorganic, organic, and encapsulated minerals in vegetable meal based diets for Sparus aurata (Linnaeus, 1758)
Source: PeerJ. 2017 Oct 27;5:e3710. doi: 10.7717/peerj.3710 (PMC5661455; doi:10.7717/peerj.3710)
Supplement: Supplemental Information 1 — Vertebrae 3–6 and 13–16 were measured for length, height and vertebral length/vertebral height. Measurements were carried for fish fed a diet based on vegetable ingredients (C-) without mineral supplementation and fish fed a diet based on fish meal and fish oil. Vertebra 13 was the only vertebra to be different between both treatments for vertebra length and vertebral length/vertebral height. [file peerj-05-3710-s001.xlsx]

## Sheet: VERTEBRAL MORPHOLOGY
PAPER:	Inorganic, organic, and encapsulated minerals in vegetable meals based diets for Sparus aurata (Linnaeus, 1758)
AUTHORS:	David Domínguez, Simona Rimoldi, Lidia Robaina, Silvia Torrecillas, Genciana Terova, María J. Zamorano, Vasileios Karalazos, Kristin Hamre and Marisol Izquierdo
CRITERIA:	Vertebral morphology
UNIT:	mm
DIET	TANK	VERTEBRAL HEIGHT								VERTEBRAL LENGTH								VERTEBRAL LENGTH / VERTEBRAL HEIGHT
		ANTERIOR VERTEBRAE				POSTERIOR VERTEBRAE				ANTERIOR VERTEBRAE				POSTERIOR VERTEBRAE				ANTERIOR VERTEBRAE				POSTERIOR VERTEBRAE
		V-3	V-4	V-5	V-6	V-13	V-14	V-15	V-16	V-3	V-4	V-5	V-6	V-13	V-14	V-15	V-16	V-3	V-4	V-5	V-6	V-13	V-14	V-15	V-16
C-	1	3.056	3.006	2.9495	2.9295	3.1515	3.1435	3.085	3.0675	2.9665	3.1965	3.47	3.702	4.162	4.2335	4.241	4.3585	0.970713	1.06337	1.17647	1.2637	1.32064	1.34675	1.37472	1.42086
C-	2	2.906	2.8695	2.9065	2.8355	3.187	3.1705	3.0925	3.0305	2.8955	3.2105	3.5015	3.6655	4.196	4.195	4.214	4.2725	0.996387	1.11884	1.20471	1.29272	1.3166	1.32314	1.36265	1.40983
C-	3	2.9135	2.8545	2.8345	2.9205	3.208	3.203	3.1255	3.084	3.078	3.2605	3.507	3.683	4.227	4.193	4.285	4.317	1.05646	1.14223	1.23726	1.26109	1.31764	1.30909	1.37098	1.39981
C+	1	3.0115	2.9555	2.9275	2.9195	3.262	3.173	3.0935	3.079	2.9595	3.174	3.475	3.636	4.218	4.23	4.2415	4.3145	0.982733	1.07393	1.18702	1.24542	1.29307	1.33312	1.3711	1.40127
C+	2	3.0485	2.9425	2.9515	2.978	3.231	3.2345	3.1905	3.1925	3.01	3.2975	3.5495	3.74	4.276	4.313	4.322	4.382	0.987371	1.12065	1.20261	1.25588	1.32343	1.33344	1.35465	1.37259
C+	3	3.0585	2.8775	2.8185	2.88	3.1975	3.1415	3.1485	3.143	3.0955	3.367	3.586	3.8035	4.4985	4.509	4.553	4.542	1.0121	1.17011	1.27231	1.32066	1.40688	1.4353	1.44609	1.44512
Mean
C-		2.9585	2.91	2.89683	2.89517	3.18217	3.17233	3.101	3.06067	2.98	3.2225	3.49283	3.6835	4.195	4.20717	4.24667	4.316	1.00727	1.10739	1.20574	1.27229	1.31828	1.30909	1.37098	1.39981
C+		3.0395	2.92517	2.89917	2.92583	3.23017	3.183	3.14417	3.13817	3.02167	3.2795	3.53683	3.7265	4.33083	4.35067	4.37217	4.41283	0.994133	1.12113	1.21995	1.27365	1.34075	1.36684	1.39056	1.40618
SIGNIFICANCE		0.087	0.709	0.954	0.381	0.158	0.778	0.255	0.055	0.326	0.217	0.319	0.362	0.019	0.011	0.035	0.106	0.304	0.467	0.287	0.917	0.015	0.155	0.141	0.928
